# Supplementary material for: Whole-genome bisulfite sequencing with improved accuracy and cost
Source: PubMed Central journal article supplement — Genome Res. 2018 Sep;28(9):1364–71. doi: 10.1101/gr.232587.117 (PMC6120621; doi:10.1101/gr.232587.117), 2018-09
Supplement: supp_gr.232587.117_Supplemental_Fig_S1.pdf [file supp_gr.232587.117_Supplemental_Fig_S1.pdf]

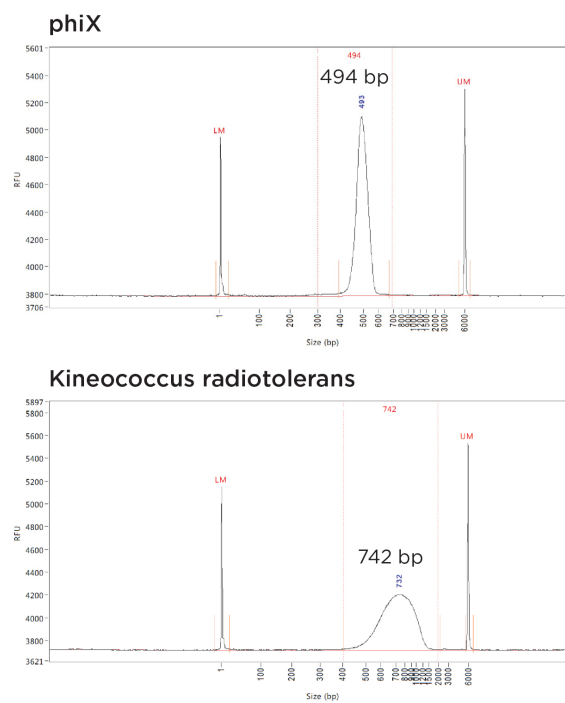

**Supplemental Fig 1:** Library sizes for spike-in controls.

Using the BioAnalyzer (Agilent) we tested the sizes of the PhiX (top) and *Kineococcus radiotolerans* (bottom) spike-in libraries. The latter is ~150 bp larger in insert size than the former.
