# Supplementary material for: Whole-genome bisulfite sequencing with improved accuracy and cost
Source: PubMed Central journal article supplement — Genome Res. 2018 Sep;28(9):1364–71. doi: 10.1101/gr.232587.117 (PMC6120621; doi:10.1101/gr.232587.117), 2018-09
Supplement: supp_gr.232587.117_Supplemental_Fig_S2.pdf [file supp_gr.232587.117_Supplemental_Fig_S2.pdf]

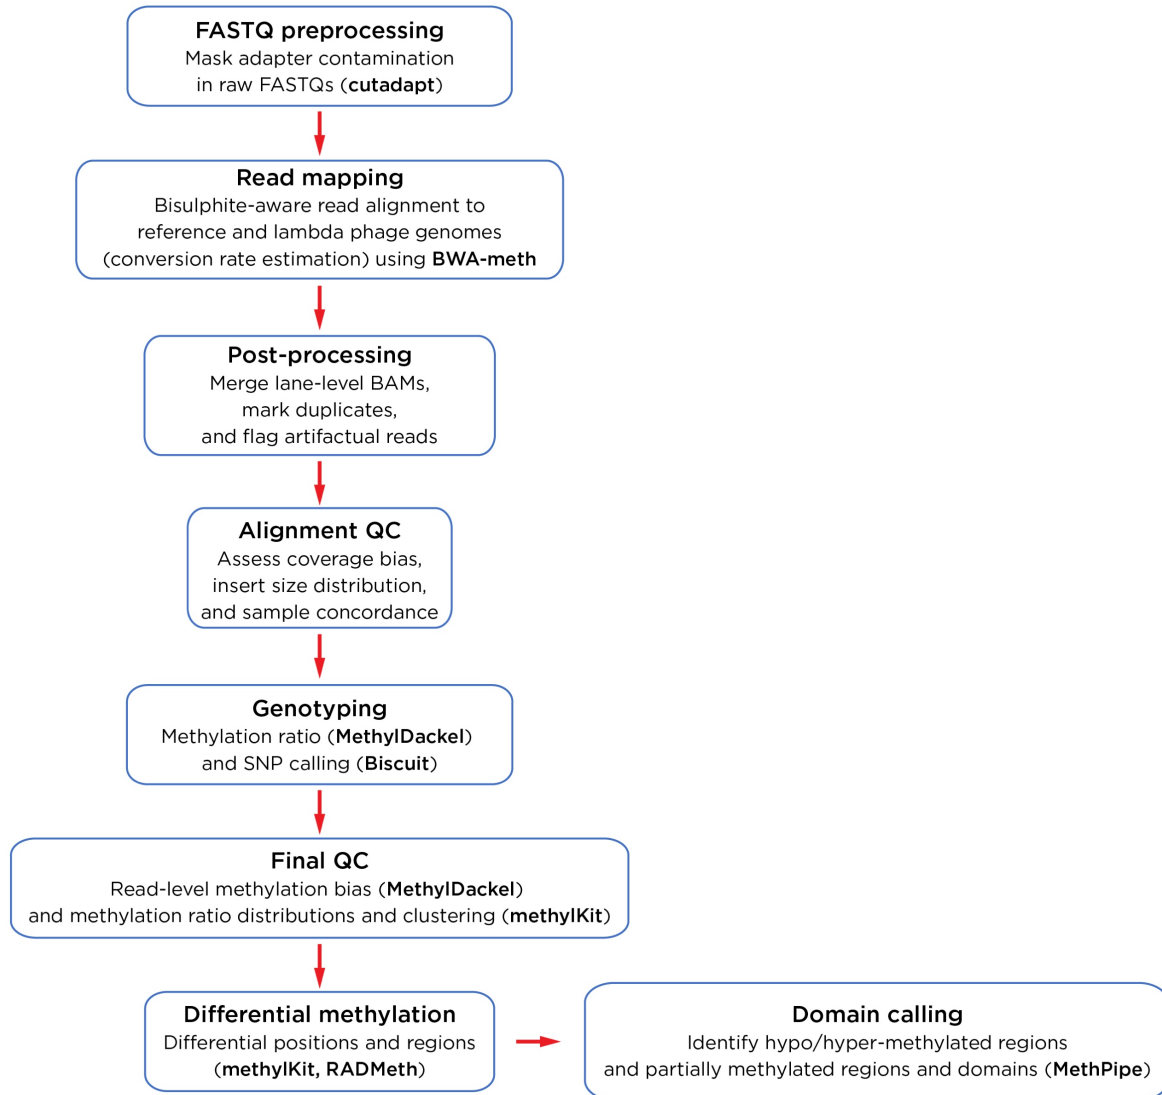

**Supplemental Fig S2:** Overview of our analytical pipeline.

The analytical pipeline we use is relatively standard for bisulphite sequencing analysis. The choices of individual analytical tools within the pipeline are highlighted.
