# Supplementary material for: Whole-genome bisulfite sequencing with improved accuracy and cost
Source: PubMed Central journal article supplement — Genome Res. 2018 Sep;28(9):1364–71. doi: 10.1101/gr.232587.117 (PMC6120621; doi:10.1101/gr.232587.117), 2018-09
Supplement: supp_gr.232587.117_Supplemental_Fig_S3.pdf [file supp_gr.232587.117_Supplemental_Fig_S3.pdf]

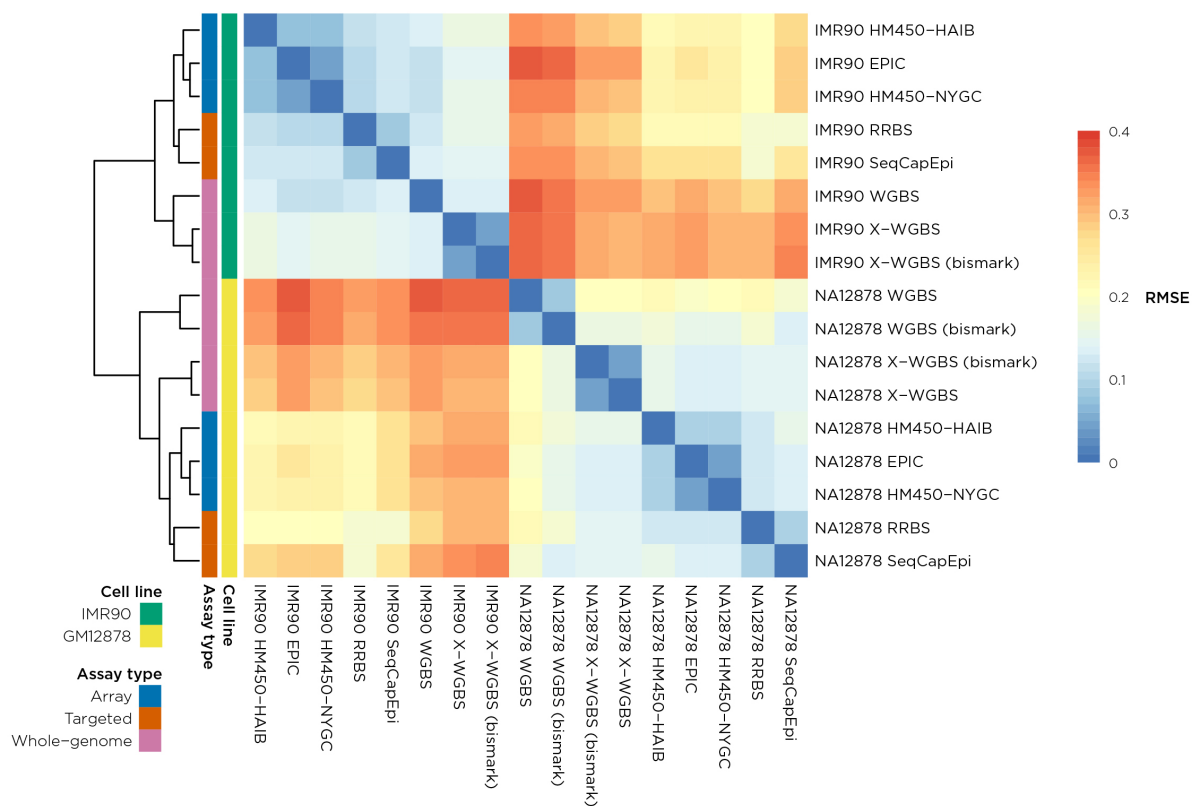

**Supplemental Fig S3:** Concordance of DNA methylation measured by different assays in two cell types.

We measure the concordance of DNA methylation values between samples (at loci with  $\geq 10$  read coverage) using the root-mean-square error (RMSE), with lower error values (blue) indicating higher concordance between measurements. There is a clear difference between the values for the IMR-90 and GM12878 cell types, with X-WGBS clustering with WGBS results using older technology. When Bismark was used as an alternative analytical approach to bwa-meth, the results were more concordant by sample and assay than by analytical approach, indicating that the two analytical approaches generated similar results.
