# Supplementary material for: Whole-genome bisulfite sequencing with improved accuracy and cost
Source: PubMed Central journal article supplement — Genome Res. 2018 Sep;28(9):1364–71. doi: 10.1101/gr.232587.117 (PMC6120621; doi:10.1101/gr.232587.117), 2018-09
Supplement: supp_gr.232587.117_Supplemental_Fig_S5.pdf [file supp_gr.232587.117_Supplemental_Fig_S5.pdf]

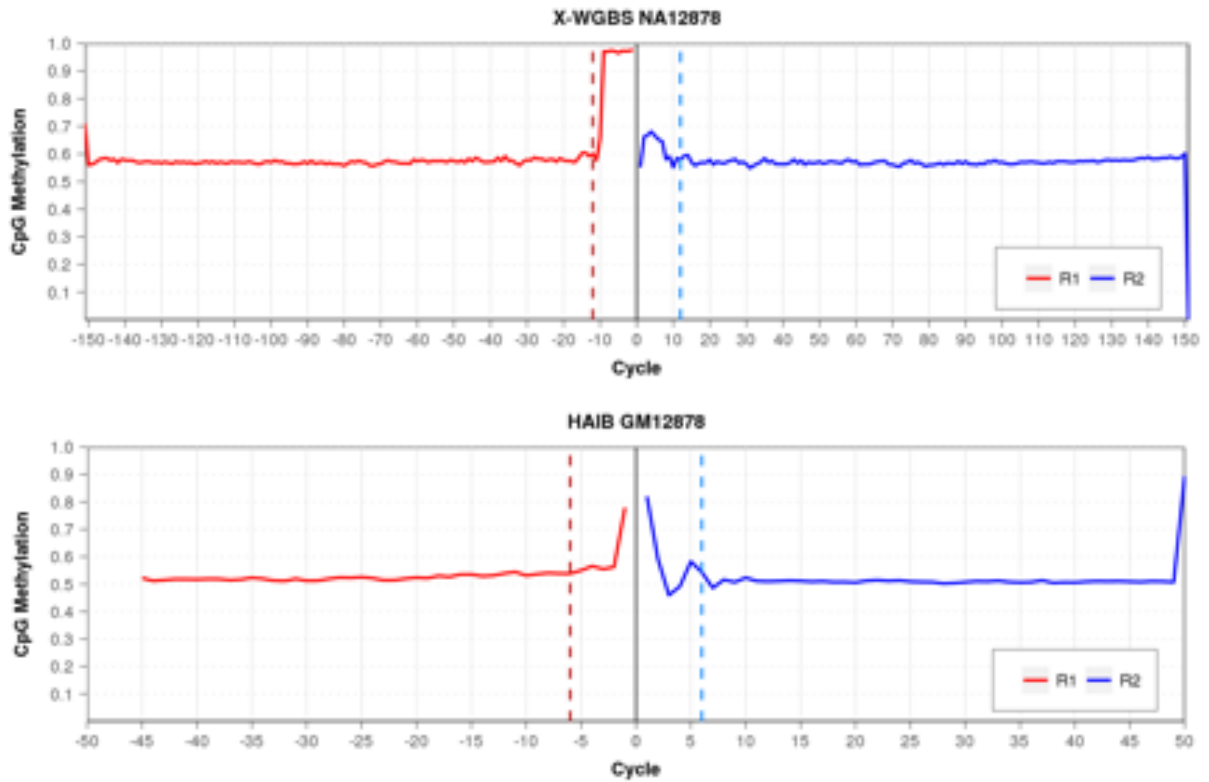

**Supplemental Fig S5:** Read bias plots.

Using Bismark, we generated read bias plots that show the typical deviation from the expected C/T ratio at the beginning of the read, where end-repair was performed, using both our X-WGBS approach (top) and a prior WGBS approach (bottom). R1 read 1, R2 read 2.
