# Supplementary material for: Whole-genome bisulfite sequencing with improved accuracy and cost
Source: HighWire-hosted journal article supplement (doi:10.1101/gr.232587.117), 2018-08-09
Supplement: Supplemental_Table_S1.xlsx [file Supplemental_Table_S1.xlsx]

## Sheet: NA12878_IMR90.finalData.flagsta
		GM12878		GM12878 (bismark)		IMR90		IMR90 (bismark)
Reads	Total reads	952781390		952781390		872290663		872290663
	QC-failed	44337010	0.0465343	9728367	0.0102105	31396889	0.0359936	10924475	0.0125239
	Total duplicates	358070318	0.397127	194723541	0.331257	265178380	0.316562	167905618	0.277999
	Proximal duplicates (pixel distance ≤100)	13658080	0.014335	N/A		8456904	0.00969505	N/A
	Mapped	901651968	0.946337	587831673	0.616964	837683462	0.960326	603978397	0.692405
	Mapped uniquely	861018582	0.90369	580257745	0.609015	797102500	0.913804	595738938	0.682959
	Mapped uniquely, no duplicates	516770486	0.542381	389061899	0.408343	545709833	0.625605	431233777	0.494369
Insert sizes	Median insert size (bp)	348		330		267		260
	Median absolute deviation insert size (bp)	92		76		79		68
	Mean insert size (bp)	349.145		315.082		289.65		266.922
	Standard deviation insert size	150.409		108.493		136.581		98.1754
Coverage	Median coverage	21		16		20		16
	Median absolute deviation coverage	5		5		7		6
	Mean coverage	21.8903		16.4401		21.5532		17.0142
	Standard deviation coverage	10.0004		7.56713		12.8575		9.87072
Base representation	Fraction bases excluded	0.536262		0.389253		0.449445		0.451171
	Fraction bases ≥ Q20					0.969839
Data from 1 lane of sequencing on HiSeq X for each sample
5.3% Kineococcus radiotolerans spike-in (targeted 5%)
